# Supplementary material
Source: publisher site journal article supplement (https://www.degruyterbrill.com/publication/isbn/9783110309768/downloadAsset/9783110309768_Inhaltsverzeichnis.pdf)
Supplement: Supplementary file 1 [file 9783110309768_Inhaltsverzeichnis.pdf]

# Inhalt

Abkürzungen — xv

Abbildungsverzeichnis — xvii

Tabellenverzeichnis — xxiii

## 1 Einführung und Eingrenzung — 3

- 1.1 Forschungsdesiderat seit 1880 — 5
- 1.2 Anwendungsbezug der Grundlagenforschung — 7
- 1.3 Zum Aufbau der Arbeit — 9

## 2 Lauterwerb — 12

- 2.1 Theorien des Sprach- und Lauterwerbs — 15
  - 2.1.1 *Inside-Out*-Theorien — 18
  - 2.1.2 *Outside-In*-Theorien — 21
  - 2.1.3 *Inside-Out* und *Outside-In* integrierende Theorien — 23
  - 2.1.4 Jakobson 1969: Universalität des Lauterwerbs — 24
  - 2.1.5 Tomasello: *Social-pragmatic-view* und *usage-based-theory* — 27
  - 2.1.6 Pruden/Hirsh-Pasek/Golinkoff 2006: *ECM* — 31
- 2.2 Faktoren und Merkmale des Lauterwerbs — 33
  - 2.2.1 Entwicklung der physischen Grundlagen des Artikulierens — 34
  - 2.2.2 Perzeption und ihr Verhältnis zur Produktion — 38
  - 2.2.3 Umgebungssprache, insbesondere die Sprache der Eltern — 40
  - 2.2.4 Kognitive Voraussetzungen — 42
- 2.3 Studien zum Lauterwerb des Standarddeutschen — 43
  - 2.3.1 Möhring 1939 — 47
  - 2.3.2 Fox/Dodd 1999 bzw. Fox 2004 — 50
- 2.4 Erwerbsphasen und Erwerb des Phonemsystems — 53
  - 2.4.1 Erwerb und Vervollständigung des Phonemsystems — 56
  - 2.4.2 Erwerbshierarchie der Phoneme des Deutschen — 59
- 2.5 Erwerbssprachliche Approximationslaute — 61
- 2.6 Zum Variationsbegriff in der Spracherwerbsforschung — 69

## 3 Moderne Regionalsprachenforschung — 73

- 3.1 Sprachdynamiktheorie (Schmidt/Herrgen 2011) — 75
  - 3.1.1 Struktur der individuellen sprachlichen Kompetenz — 76
  - 3.1.2 Synchronisierung — 77

|          |                                                         |           |
|----------|---------------------------------------------------------|-----------|
| 3.1.3    | Varietät, Sprechlage und Situation —                    | 80        |
| 3.2      | Standardsprache und Regionalsprache —                   | 82        |
| 3.2.1    | Zur Genese vertikaler Varietätenspektren —              | 84        |
| 3.2.2    | Vertikale Struktur der Wittlicher Regionalsprache —     | 85        |
| 3.2.3    | Variationskompetenz —                                   | 89        |
| <b>4</b> | <b>Erwerb von Varietäten- und Variationskompetenz —</b> | <b>92</b> |
| 4.1      | Einführung und Typen des Varietätenerwerbs —            | 92        |
| 4.1.1    | <i>Second dialect acquisition</i> —                     | 100       |
| 4.1.2    | Bivarietärer Spracherwerb in der Deutschschweiz —       | 105       |
| 4.2      | Theoretische Ansätze —                                  | 110       |
| 4.2.1    | Labov 1964 —                                            | 110       |
| 4.2.2    | Mattheier 1980 —                                        | 113       |
| 4.2.3    | Scholten 1988 —                                         | 114       |
| 4.2.4    | Macha 1991 —                                            | 115       |
| 4.2.5    | Schmidt/Herrgen 2011 —                                  | 119       |
| 4.3      | Empirische Studien —                                    | 124       |
| 4.3.1    | Möhring 1939 —                                          | 126       |
| 4.3.2    | Labov 1964 —                                            | 129       |
| 4.3.3    | Hoffmann 1978 —                                         | 130       |
| 4.3.4    | Portz 1982 —                                            | 132       |
| 4.3.5    | Scholten 1988 —                                         | 134       |
| 4.3.6    | Vousten/Bongaerts 1995, Vousten 1995 —                  | 146       |
| 4.3.7    | Roberts/Labov 1995, Roberts 1997a, Roberts 1997b —      | 147       |
| 4.3.8    | Díaz-Campos 2001 und Díaz-Campos 2004 —                 | 149       |
| 4.3.9    | Foulkes/Docherty/Watts 1999, Docherty u. a. 2006 —      | 150       |
| 4.3.10   | Rys/Bonte 2005, Rys 2007 —                              | 152       |
| 4.4      | Faktoren des Varietäten- und Variationserwerbs —        | 155       |
| 4.4.1    | Individualität und Kommunikationssituationen —          | 157       |
| 4.4.2    | Varietätenverwendung der Eltern —                       | 159       |
| 4.4.3    | Einstellung und Einschätzung der Eltern —               | 163       |
| 4.4.4    | Varietätenverwendung in der <i>peer group</i> —         | 166       |
| 4.4.5    | Perzeption: Ausbildung phonemischer Kontraste —         | 167       |
| 4.4.6    | Erwerb von Varietäten- und Situationswissen —           | 168       |
| 4.4.7    | Einstellung und Einschätzung von Varietäten —           | 170       |
| 4.4.8    | Kindergarten und Schule —                               | 173       |
| 4.4.9    | Alter und Geschlecht —                                  | 176       |

- 5 Theoriebildung: Regionaler Erstspracherwerb — 180**
- 5.1 Individuell-kognitive Entwicklung — 181
  - 5.2 Sozio-pragmatische Entwicklung — 186
  - 5.3 Sozio-pragmatischer Varietäten- und Variationserwerb — 188
  - 5.4 Dynamik des regionalen Erstspracherwerbs des Deutschen — 191
- 6 Methoden der Datenerhebung — 196**
- 6.1 Einführung und Forschungsfragen — 196
  - 6.2 Informanten — 201
  - 6.3 Erhebungsmethoden und Erhebungssituationen — 203
  - 6.3.1 Familiengespräch (Fam) — 205
  - 6.3.2 Freundesgespräch (Freu) — 206
  - 6.3.3 Interview (Int) — 210
  - 6.3.4 Varietäten- bzw. Sprechlagen-Tests — 211
- 7 Methoden der Datenanalyse — 214**
- 7.1 Standarddifferenzmessung — 217
  - 7.1.1 Linguistische Einheit des Divisors — 220
  - 7.1.2 Quantität der Analyseeinheiten — 222
  - 7.2 Variablenanalyse — 225
  - 7.2.1 Variablen-Typen: Varietätenkontrast und Nullkontrast — 227
  - 7.2.2 Bestimmung von Variablen und Quantität von Varianten — 228
  - 7.3 Datenaufbereitung und -bearbeitung — 232
  - 7.3.1 Transliteration und Transkription — 232
  - 7.3.2 Relationale Datenbank — 234
- 8 Einführung zur Ergebnisdarstellung — 240**
- 9 Klassifikation und Beschreibung der lautlichen Variation — 242**
- 9.1 Langvokale — 244
  - 9.1.1 Bezugsphoneme /a/ und /a:/ — 244
  - 9.1.1.1 Variable »/a/, /a:/ ∈ ahd. ⟨a⟩, ⟨ā⟩« — 247
  - 9.1.1.2 Variable »/a/, /a:/ ∈ *haben*-Paradigma« — 248
  - 9.1.1.3 Variable »/a:/ ∈ *da, ja, mal*« — 249
  - 9.1.1.4 Variable »/a/ ∈ *das, was*« — 251
  - 9.1.2 Bezugsphonem /e:/ — 252
  - 9.1.2.1 Variablen »/e:/ ∈ mhd. ⟨e⟩« und »/e:/ ∈ mhd. ⟨ē⟩« — 256
  - 9.1.2.2 Variablen »/e:/ ∈ *der*« und »/e:/ ∈ *den, dem*« — 257

|         |                                          |            |
|---------|------------------------------------------|------------|
| 9.1.3   | Bezugsphonem /o:/ —                      | <b>259</b> |
| 9.1.4   | Bezugsphonem /ø:/ —                      | <b>262</b> |
| 9.1.5   | Bezugsphonem /i:/ —                      | <b>263</b> |
| 9.1.6   | Bezugsphonem /u:/ —                      | <b>269</b> |
| 9.1.7   | Bezugsphonem /y:/ —                      | <b>271</b> |
| 9.1.8   | Bezugsphonem /ɛ:/ —                      | <b>272</b> |
| 9.2     | Kurzvokale —                             | <b>275</b> |
| 9.2.1   | Bezugsphonem /ɔ/ —                       | <b>275</b> |
| 9.2.2   | Bezugsphonem /œ/ —                       | <b>278</b> |
| 9.2.3   | Bezugsphonem /ɪ/ —                       | <b>279</b> |
| 9.2.4   | Bezugsphonem /ʊ/ —                       | <b>283</b> |
| 9.2.5   | Bezugsphonem /ʏ/ —                       | <b>285</b> |
| 9.2.6   | Bezugsphonem /ɛ/ —                       | <b>286</b> |
| 9.2.7   | Bezugssegment [ə] —                      | <b>288</b> |
| 9.3     | Diphthonge —                             | <b>293</b> |
| 9.3.1   | Bezugsphonem /âi/ —                      | <b>294</b> |
| 9.3.2   | Bezugsphonem /âü/ —                      | <b>298</b> |
| 9.3.3   | Bezugsphonem /îi/ —                      | <b>302</b> |
| 9.4     | Plosive —                                | <b>302</b> |
| 9.4.1   | Bezugsphonem /b/ —                       | <b>303</b> |
| 9.4.2   | Bezugsphonem /d/ —                       | <b>307</b> |
| 9.4.3   | Bezugsphonem /g/ —                       | <b>310</b> |
| 9.4.4   | Bezugsphonem /p/ —                       | <b>314</b> |
| 9.4.5   | Bezugsphonem /t/ —                       | <b>317</b> |
| 9.4.6   | Bezugsphonem /k/ —                       | <b>324</b> |
| 9.5     | Frikative —                              | <b>326</b> |
| 9.5.1   | Bezugsphonem /ç/ —                       | <b>326</b> |
| 9.5.1.1 | Variable »[ç] ∈ /ç/« —                   | <b>328</b> |
| 9.5.1.2 | Variable »Lexem <i>nicht</i> « —         | <b>330</b> |
| 9.5.2   | Bezugsphonem /ʃ/ —                       | <b>332</b> |
| 9.5.3   | Bezugsphoneme /ç/ und /ʃ/ im Vergleich — | <b>334</b> |
| 9.5.4   | Bezugsphonem /ʒ/ —                       | <b>337</b> |
| 9.5.5   | Bezugsphonem /s/ —                       | <b>337</b> |
| 9.5.6   | Bezugsphonem /z/ —                       | <b>341</b> |
| 9.5.7   | Bezugsphonem /f/ —                       | <b>344</b> |
| 9.5.8   | Bezugsphonem /v/ —                       | <b>346</b> |
| 9.5.9   | Bezugsphonem /h/ —                       | <b>348</b> |

- 9.6 Affrikaten — **349**
- 9.6.1 Bezugsphonem /pʰf/ — **349**
- 9.6.2 Bezugsphonem /tʰs/ — **350**
- 9.7 Nasale — **353**
- 9.7.1 Bezugsphonem /m/ — **353**
- 9.7.2 Bezugsphonem /n/ — **354**
- 9.7.3 Bezugsphonem /ŋ/ — **360**
- 9.8 Bezugsphonem /r/ — **362**
- 9.9 Approximanten — **369**
- 9.9.1 Bezugsphonem /j/ — **369**
- 9.9.2 Bezugsphonem /l/ — **370**
  
- 10 Vergleichende Analyse der Bezugsphoneme — 372**
- 10.1 Frequenz und Standarddifferenz der Bezugsphoneme — **372**
- 10.2 Varietätenkontraste und Nullkontraste im Vergleich — **379**
- 10.2.1 Erwerbssprachliche Variation — **382**
- 10.2.2 Inexplizite Variation — **384**
- 10.2.3 Situative Variation — **388**
- 10.2.3.1 Situative Variation erwspr. Varianten in VK und NK — **393**
- 10.2.3.2 Situative Variation inexpl. Varianten in VK und NK — **397**
- 10.3 Varietätenkontraste (regionalsprachliche Variation) — **401**
- 10.3.1 Situative Variation — **407**
- 10.3.2 Individuelle Variation — **412**
  
- 11 Varietäten- und Variationserwerb — 418**
- 11.1 Varietätenerwerb — **418**
- 11.2 Variationserwerb — **434**
- 11.2.1 Variationskompetenz und Standarddifferenz — **434**
- 11.2.2 Individuelle situative Variationsmuster — **437**
- 11.2.3 Situativer Zusammenhang der regspr. und stdspr. Vnt — **445**
- 11.2.4 Individuelle situative und diasituative Entwicklung — **450**
- 11.3 Typen des regionalen Erstspracherwerbs — **461**
- 11.3.1 Typ 1: Bivarietärer Erwerb — **466**
- 11.3.2 Typ 2: Monovarietär regiolektaler Erwerb — **473**
- 11.3.2.1 Jan — **473**
- 11.3.2.2 Linus — **479**
- 11.3.3 Typ 3: Monovarietär standardnaher Erwerb — **484**

**xiv — Inhalt**

**12 Zusammenfassung und Ausblick — 490**

**A Datentabellen — 507**

**B Variablenindex — 522**

**C Elternfragebogen und Interviewleitfäden — 526**

**D Datenbank-ERM — 531**

**Literatur — 533**

**Register — 561**
